# Supplementary material
Source: MDPI journal article supplement (https://www.mdpi.com/2304-6740/5/3/55)
Supplement: s1 [file s1]

# Supplementary Materials: Modification of Cooperativity and Critical Temperatures on a Hofmann-Like Template Structure by Modular Substituent

Takashi Kosone, Takeshi Kawasaki, Itaru Tomori, Jun Okabayashi and Takafumi Kitazawa

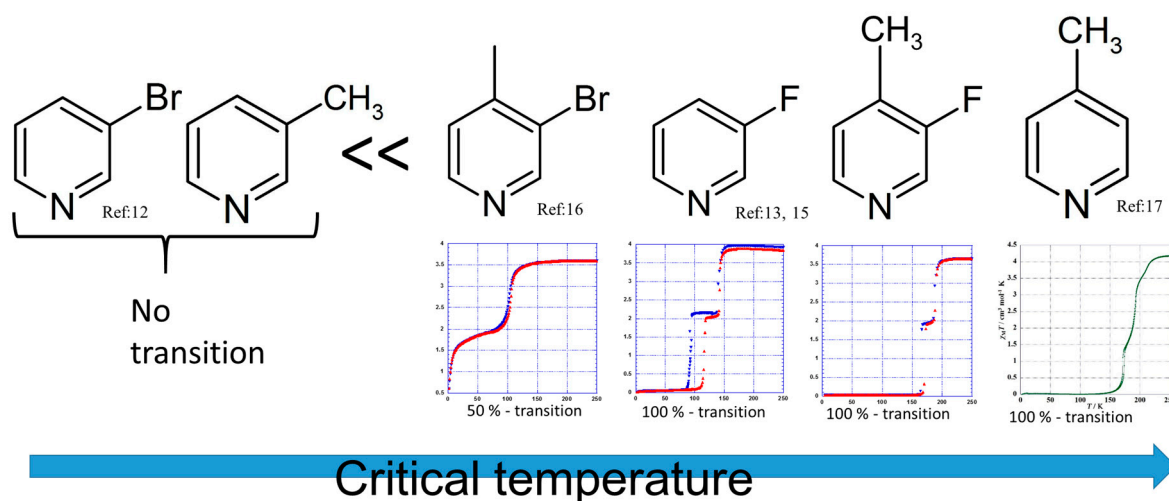

**Scheme S1.** Critical temperature ( $T_c$ ) changes depending on the substituent of  $\{\text{Fe}(\text{X-py})_2[\text{Au}(\text{CN})_2]_2\}$  ( $\text{X}$  = 3-F-4-Methyl (1), 3-Methyl (2), 3-F (3), 4-Methyl (4), 3-Br (5) and 3-Br-4-Methyl (6))

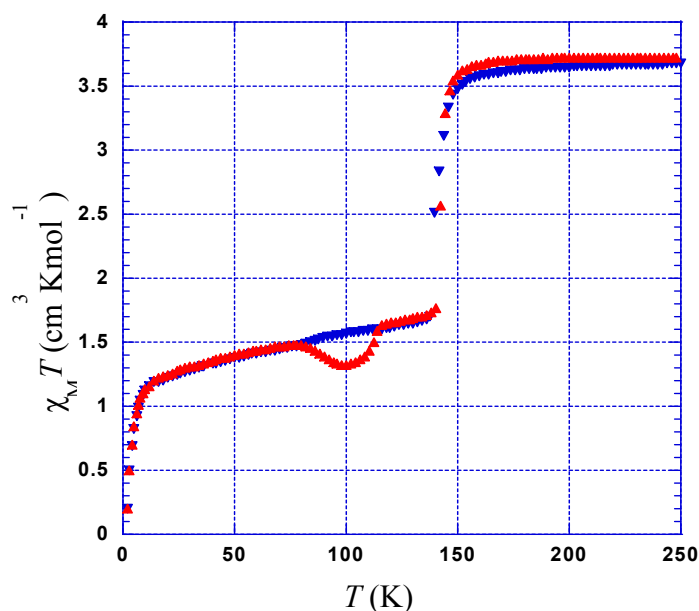

**Figure S1.** Thermal dependence of spin transition curve for 3. The samples were cooled from 300 to 2 K and then warmed again to 300 K in the cooling mode at rates of  $2 \text{ K} \cdot \text{min}^{-1}$  and warming mode at rates of  $2 \text{ K} \cdot \text{min}^{-1}$

**Table S1.** Crystal data and structure refinement for compounds **1** and **2**.

| Crystal data                               | <b>1</b> (293 K)                                                                | <b>1</b> (180 K)                                                                | <b>1</b> (90 K)                                                                 | <b>2</b> (293 K)                                                 |
|--------------------------------------------|---------------------------------------------------------------------------------|---------------------------------------------------------------------------------|---------------------------------------------------------------------------------|------------------------------------------------------------------|
| Empirical formula                          | C <sub>16</sub> H <sub>12</sub> Au <sub>2</sub> F <sub>2</sub> FeN <sub>6</sub> | C <sub>16</sub> H <sub>12</sub> Au <sub>2</sub> F <sub>2</sub> FeN <sub>6</sub> | C <sub>16</sub> H <sub>12</sub> Au <sub>2</sub> F <sub>2</sub> FeN <sub>6</sub> | C <sub>16</sub> H <sub>14</sub> Au <sub>2</sub> FeN <sub>6</sub> |
| FW                                         | 776.10                                                                          | 776.10                                                                          | 776.10                                                                          | 740.11                                                           |
| Temperature (K)                            | 293(2)                                                                          | 180(2)                                                                          | 90(2)                                                                           | 293(2)                                                           |
| Crystal system                             | Monoclinic                                                                      | Monoclinic                                                                      | Monoclinic                                                                      | Monoclinic                                                       |
| Space group                                | <i>P</i> 2 <sub>1</sub> / <i>c</i>                                              | <i>P</i> 2 <sub>1</sub> / <i>c</i>                                              | <i>P</i> 2 <sub>1</sub> / <i>c</i>                                              | <i>P</i> 2 <sub>1</sub> / <i>c</i>                               |
| <i>a</i> (Å)                               | 9.9889(14)                                                                      | 9.701(10)                                                                       | 9.8320(9)                                                                       | 9.3741(5)                                                        |
| <i>b</i> (Å)                               | 14.967(2)                                                                       | 14.496(16)                                                                      | 14.3623(13)                                                                     | 14.5078(8)                                                       |
| <i>c</i> (Å)                               | 14.422(2)                                                                       | 14.009(15)                                                                      | 13.9396(13)                                                                     | 15.1866(8)                                                       |
| $\alpha$ (°)                               |                                                                                 |                                                                                 |                                                                                 |                                                                  |
| $\beta$ (°)                                | 91.675(3)                                                                       | 91.526(3)                                                                       | 91.5485(3)                                                                      | 106.8850(10)                                                     |
| $\gamma$ (°)                               |                                                                                 |                                                                                 |                                                                                 |                                                                  |
| <i>V</i> (Å <sup>3</sup> )                 | 2155.2(5)                                                                       | 1969(4)                                                                         | 1967.7(3)                                                                       | 1976.30(18)                                                      |
| <i>Z</i>                                   | 4                                                                               | 4                                                                               | 4                                                                               | 4                                                                |
| Absorption coefficient (mm <sup>−1</sup> ) | 14.273                                                                          | 15.620                                                                          | 15.633                                                                          | 15.544                                                           |
| <i>d</i> (calc.) (Mg/m <sup>3</sup> )      | 2.392                                                                           | 2.618                                                                           | 2.620                                                                           | 2.487                                                            |
| <i>F</i> (000)                             | 1408                                                                            | 1408                                                                            | 1408                                                                            | 1344                                                             |
| Crystal size (mm <sup>−3</sup> )           | 0.12 × 0.11 × 0.10                                                              | 0.10 × 0.10 × 0.08                                                              | 0.12 × 0.11 × 0.10                                                              | 0.40 × 0.35 × 0.30                                               |
| Reflections collected                      | 11249                                                                           | 7760                                                                            | 14056                                                                           | 14562                                                            |
| Independent reflections                    | 3837<br>[ <i>R</i> (int) = 0.0445]                                              | 2773<br>[ <i>R</i> (int) = 0.0823]                                              | 5866<br>[ <i>R</i> (int) = 0.0335]                                              | 4901<br>[ <i>R</i> (int) = 0.0278]                               |
| Final <i>R</i> indices                     | <i>R</i> = 0.0296,                                                              | <i>R</i> = 0.1058,                                                              | <i>R</i> = 0.0281,                                                              | <i>R</i> = 0.0258,                                               |
| [ <i>I</i> > 2σ( <i>I</i> )]               | <i>wR</i> = 0.0487                                                              | <i>wR</i> = 0.2287                                                              | <i>wR</i> = 0.526                                                               | <i>wR</i> = 0.0675                                               |
| <i>R</i> indices (all data)                | <i>R</i> = 0.0574,                                                              | <i>R</i> = 0.1421,                                                              | <i>R</i> = 0.0526,                                                              | <i>R</i> = 0.0327,                                               |
|                                            | <i>wR</i> = 0.0565                                                              | <i>wR</i> = 0.2455                                                              | <i>wR</i> = 0.0550                                                              | <i>wR</i> = 0.0714                                               |

$$R = (\sum ||Fo| - |Fc||) / \sum |Fo|$$

$$wR = \{\sum w(|Fo| - |Fc|)^2 / \sum w|Fo|^2\}^{1/2}$$

**Table S2.** Selected Bond Lengths for **1** and **2**.

| <b>1</b> (293 K)     | <b>1</b> (180 K)    | <b>1</b> (90 K)      | <b>2</b> (293 K)     |
|----------------------|---------------------|----------------------|----------------------|
| Bond lengths (Å)     | Bond lengths (Å)    | Bond lengths (Å)     | Bond lengths (Å)     |
| Fe(1)-N(1):2.219(6)  | Fe(1)-N(1):2.11(4)  | Fe(1)-N(1):2.013(4)  | Fe(1)-N(1):2.247(4)  |
| Fe(1)-N(2):2.220(6)  | Fe(1)-N(2):2.03(4)  | Fe(1)-N(2):2.002(4)  | Fe(1)-N(2):2.244(4)  |
| Fe(1)-N(3):2.142(7)  | Fe(1)-N(3):2.05(5)  | Fe(1)-N(3):1.942(4)  | Fe(1)-N(3):2.164(4)  |
| Fe(1)-N(4):2.153(6)  | Fe(1)-N(4):2.10(4)  | Fe(1)-N(4):1.944(4)  | Fe(1)-N(4):2.162(4)  |
| Fe(1)-N(5):2.160(7)  | Fe(1)-N(5):1.97(4)  | Fe(1)-N(5):1.934(4)  | Fe(1)-N(5):2.159(4)  |
| Fe(1)-N(6):2.148(6)  | Fe(1)-N(6):2.11(4)  | Fe(1)-N(6):1.936(4)  | Fe(1)-N(6):2.158(4)  |
| Au(1)-C(13):1.981(8) | Au(1)-C(13):1.88(2) | Au(1)-C(13):1.996(5) | Au(1)-C(13):1.979(5) |
| Au(1)-C(14):1.984(8) | Au(1)-C(14):1.83(6) | Au(1)-C(14):1.988(5) | Au(1)-C(14):1.979(5) |
| Au(2)-C(15):1.992(8) | Au(2)-C(15):1.91(3) | Au(2)-C(15):1.992(5) | Au(2)-C(15):1.982(5) |
| Au(2)-C(16):1.967(8) | Au(2)-C(16):1.99(8) | Au(2)-C(16):1.991(5) | Au(2)-C(16):1.979(5) |
